# Supplementary material for: Systematic Microwave-Assisted Postsynthesis of Mn-Doped Cesium Lead Halide Perovskites with Improved Color-Tunable Luminescence and Stability
Source: MDPI journal article supplement (doi:10.3390/nano12152535), 2022-07-23
Supplement: s1 [file s1]

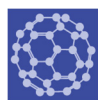

Supplementary Material

# Systematic Microwave-Assisted Postsynthesis of Mn-Doped Cesium Lead Halide Perovskites with Improved Color-Tunable Luminescence and Stability

Yaheng Zhang <sup>1</sup>, Chao Fan <sup>1</sup>, Jianghong Tang <sup>1</sup>, Gaoming Huang <sup>1</sup>, Xinfu Qiang <sup>2</sup>, Yu Fu <sup>1</sup>, Wenjuan Zhou <sup>1</sup>, Juan Wu <sup>1</sup> and Shouqiang Huang <sup>1,\*</sup>

<sup>1</sup> Jiangsu Key Laboratory of E-waste Recycling, School of Chemistry and Environmental Engineering, Jiangsu University of Technology, Changzhou 213001, China; zhangyaheng@jsut.edu.cn (Y.Z.); chaofan19930703@163.com (C.F.); tjh01@jsut.edu.cn (J.T.); hanggaoming1122@163.com (G.H.); fuyu@jsut.edu.cn (Y.F.); 2019560060@jsut.edu.cn (W.Z.); jintanwujuan@163.com (J.W.)

<sup>2</sup> Jiangsu Key Laboratory of Advanced Structural Materials and Application Technology, Nanjing Institute of Technology, Nanjing 211167, China; qiangxinfu@163.com

\* Correspondence: hshouqiang@126.com

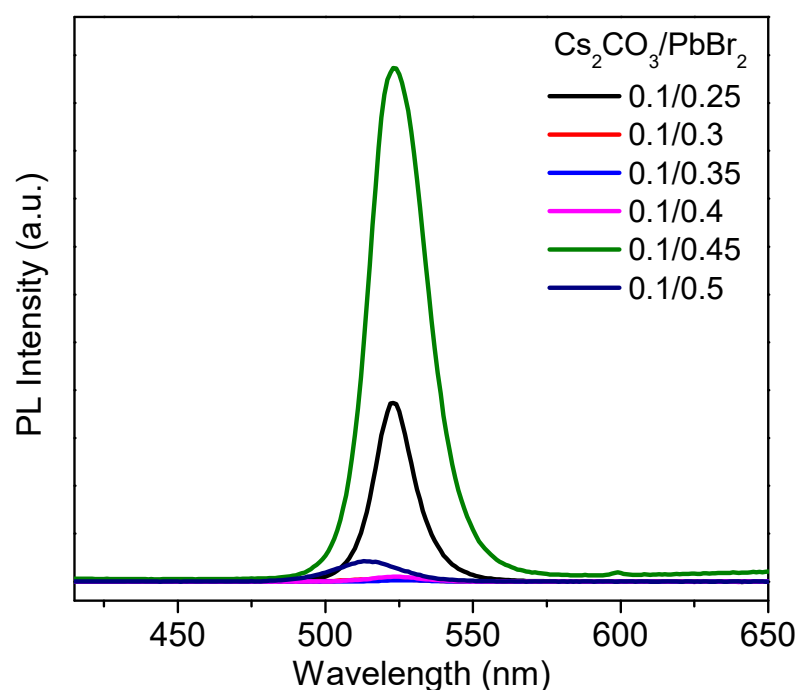

**Figure S1.** PL emission spectra of the products prepared at different feed mole ratios of  $\text{Cs}_2\text{CO}_3/\text{PbBr}_2$ .

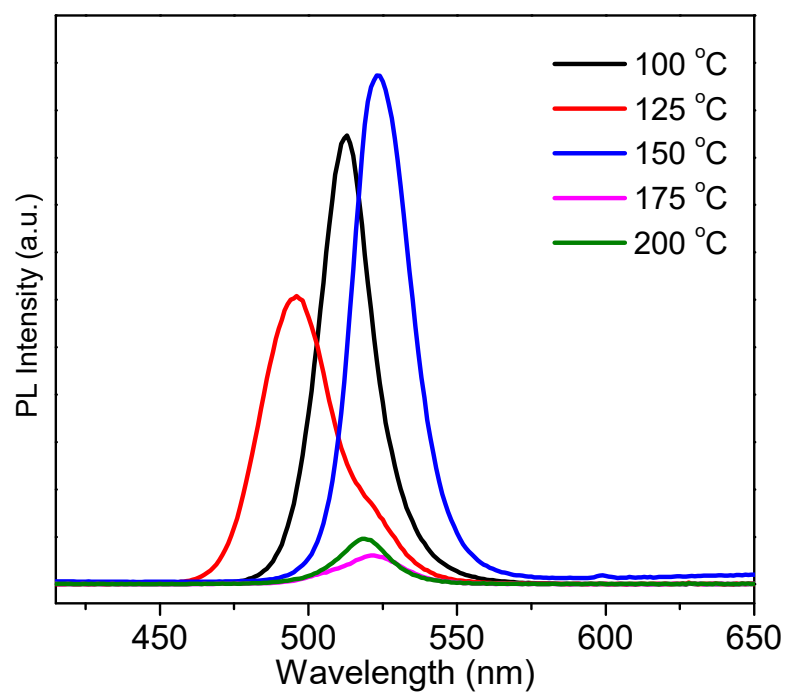

**Figure S2.** PL emission spectra of the products prepared at different reaction temperatures.

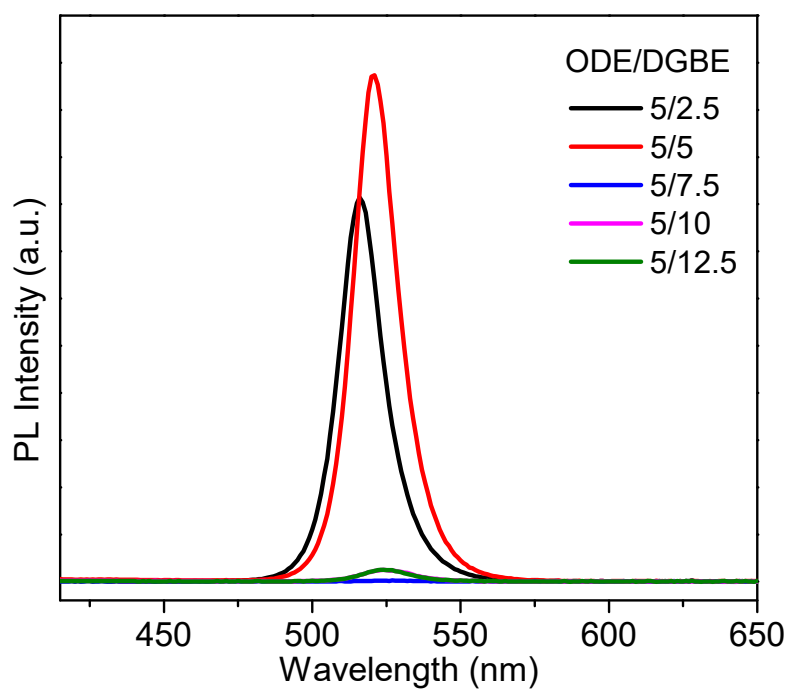

**Figure S3.** PL emission spectra of the products prepared at different volume ratios of ODE/DGBE.

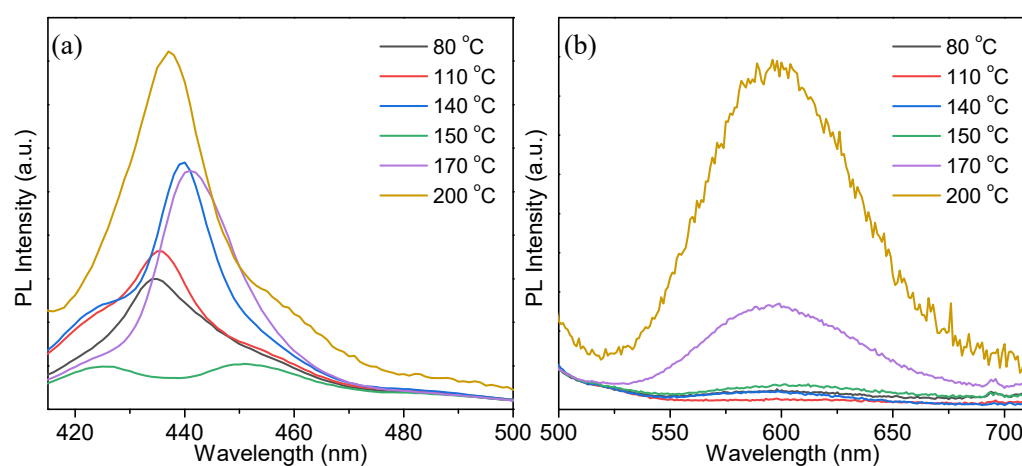

**Figure S4.** The enlarged PL emission spectra of the pristine  $\text{CsPbBr}_3$  doped with  $\text{Mn}^{2+}$  ions fabricated at different reaction temperatures: (a) 380 ~ 500 nm and (b) 500 ~ 710 nm.

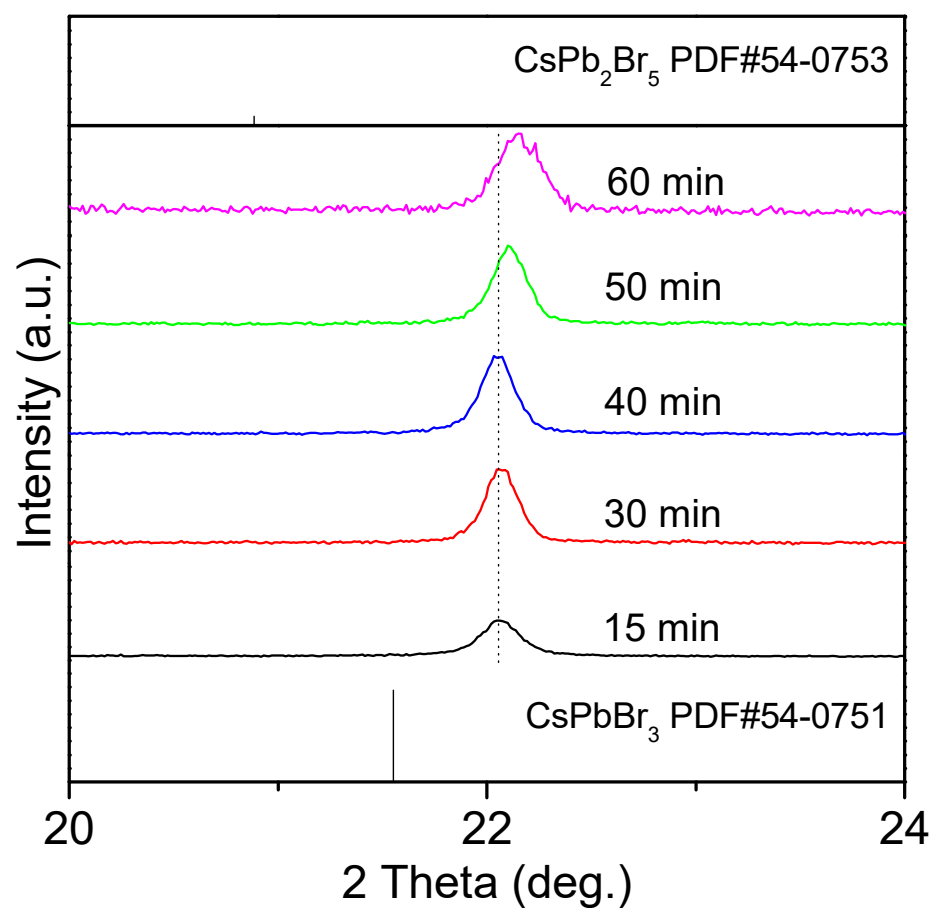

**Figure S5.** The enlarged XRD patterns of the pristine  $\text{CsPbBr}_3$  doped with  $\text{Mn}^{2+}$  ions fabricated with different reaction times in the range of  $2\theta$  from 20° to 24°.

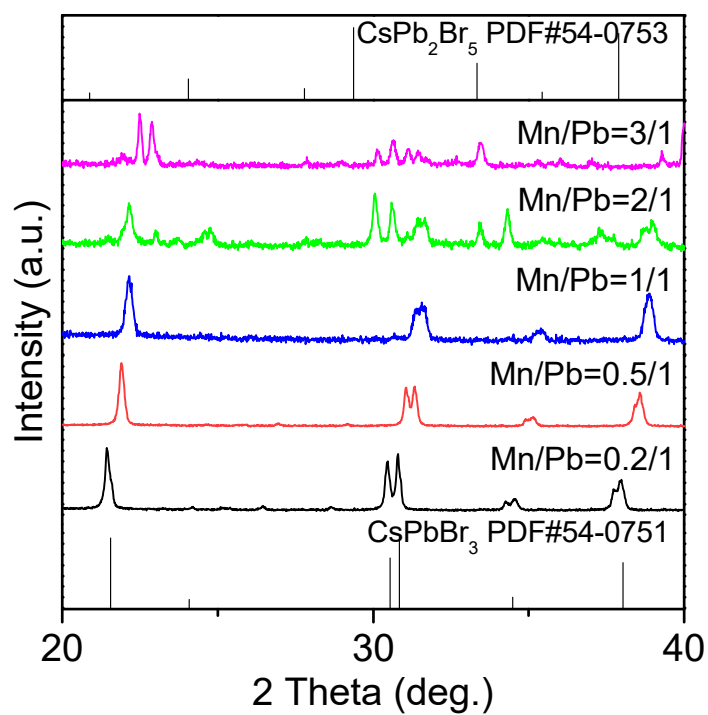

**Figure S6.** The enlarged XRD patterns of the pristine  $\text{CsPbBr}_3$  doped with  $\text{Mn}^{2+}$  ions fabricated with different  $\text{Mn}^{2+}/\text{Pb}^{2+}$  feeding ratios in the range of  $2\theta$  from  $20^\circ$  to  $40^\circ$ .

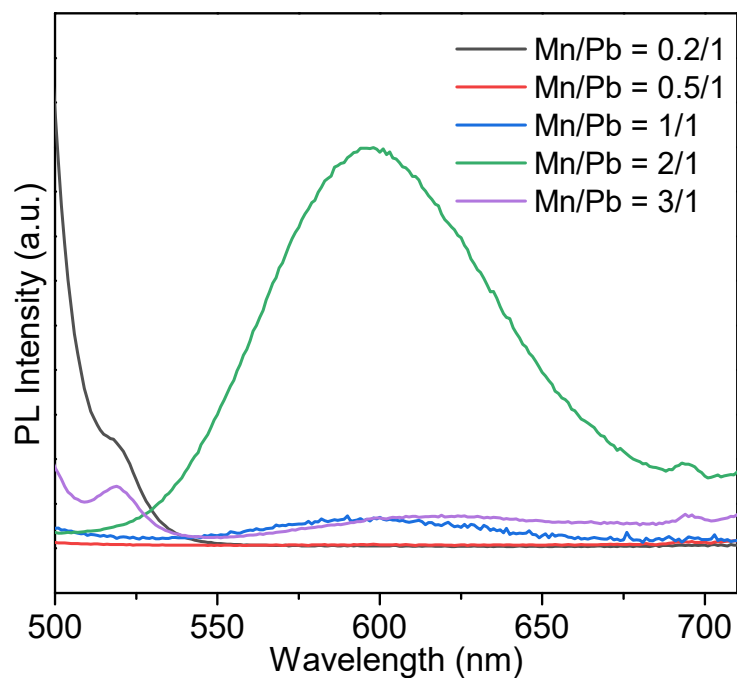

**Figure S7.** The enlarged PL emission spectra of the pristine  $\text{CsPbBr}_3$  doped with  $\text{Mn}^{2+}$  ions fabricated at different  $\text{Mn}^{2+}$  and  $\text{Pb}^{2+}$  feeding ratios.

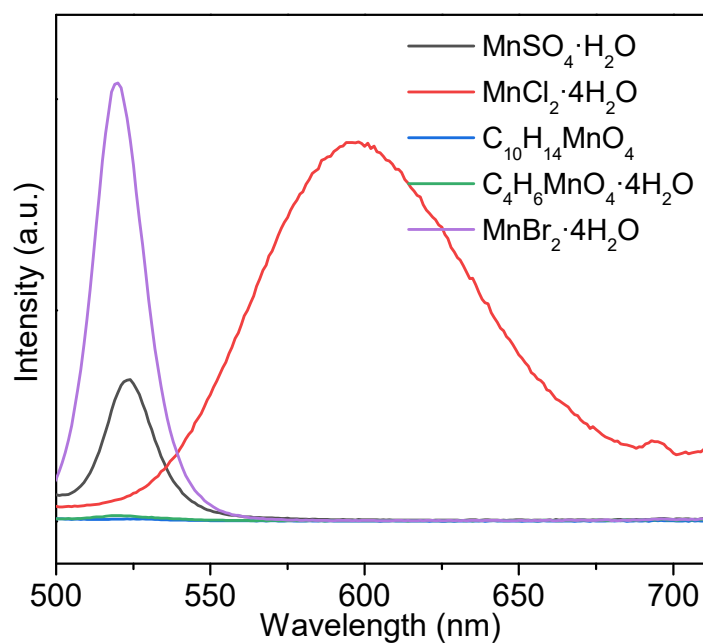

**Figure S8.** The enlarged PL emission spectra of the pristine CsPbBr<sub>3</sub> doped with Mn<sup>2+</sup> ions fabricated with different Mn<sup>2+</sup> sources.

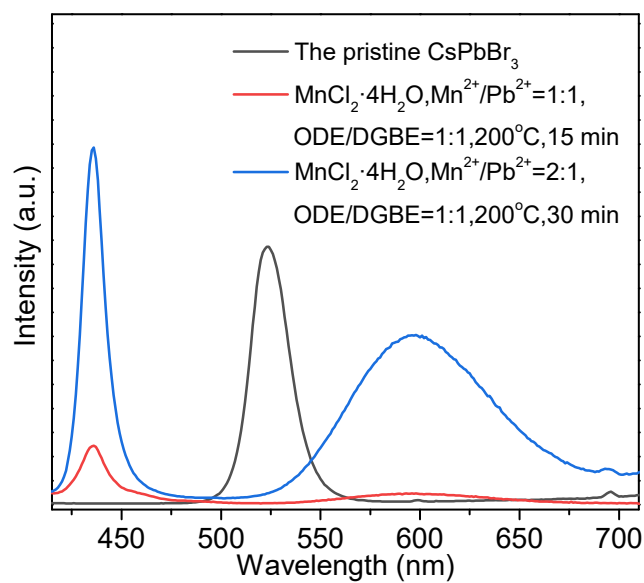

**Figure S9.** PL emission spectra of the pristine CsPbBr<sub>3</sub> and the doped products selected from the comparison of reaction time and the Mn<sup>2+</sup>/Pb<sup>2+</sup> feeding ratio. The product synthesized under the conditions of MnCl<sub>2</sub>·4H<sub>2</sub>O source, Mn<sup>2+</sup>/Pb<sup>2+</sup> = 2/1, ODE/DGBE = 5/5, 200 °C and reaction time of 30 min has the strongest PL emission, which is marked as the optimum CsPb(Cl/Br)<sub>3</sub>:Mn product.

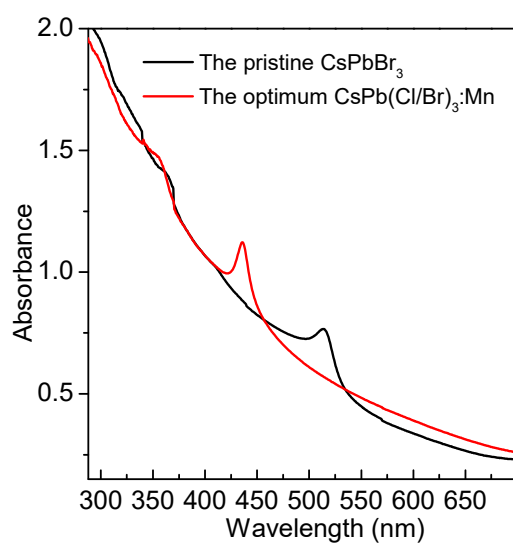

**Figure S10.** UV-vis absorption spectra of the pristine CsPbBr<sub>3</sub> and the optimum CsPb(Cl/Br)<sub>3</sub>:Mn product.

**Table S1.** Element contents of the pristine CsPbBr<sub>3</sub> and the optimum CsPb(Cl/Br)<sub>3</sub>:Mn product obtained from SEM-EDS, STEM-EDS, and XPS.

| Elements                         |          | Atomic% |                                              |      |      |      |      |
|----------------------------------|----------|---------|----------------------------------------------|------|------|------|------|
|                                  |          | Cs      | Pb                                           | Br   | Cl   | Mn   |      |
| The pristine CsPbBr <sub>3</sub> | SEM-EDS  | Point 1 | 11.7                                         | 25.0 | 63.4 | —    | —    |
|                                  |          |         | Cs: Pb: Br = 1: 2.1: 5.4                     |      |      |      |      |
|                                  |          | Point 2 | 16.5                                         | 20.4 | 63.1 | —    | —    |
|                                  |          |         | Cs: Pb: Br = 1: 1.2: 3.8                     |      |      |      |      |
|                                  |          | Point 3 | 18.5                                         | 20.1 | 61.4 | —    | —    |
|                                  |          |         | Cs: Pb: Br = 1: 1.1: 3.3                     |      |      |      |      |
| The pristine CsPbBr <sub>3</sub> | XPS      | Point 4 | 12.4                                         | 24.4 | 63.2 | —    | —    |
|                                  |          |         | Cs: Pb: Br = 1: 2.0: 5.1                     |      |      |      |      |
|                                  |          | C       | Cs                                           | Pb   | Br   | Cl   | Mn   |
|                                  |          | 89.96   | 0.63                                         | 1.09 | 8.32 | —    | —    |
|                                  |          |         | Cs: Pb: Br = 1: 1.7: 13.2                    |      |      |      |      |
|                                  |          |         |                                              |      |      |      |      |
| CsPb(Cl/Br) <sub>3</sub> :Mn     | STEM-EDS | C       | Cs                                           | Pb   | Br   | Cl   | Mn   |
|                                  |          | —       | 11.5                                         | 11.4 | 19.0 | 43.7 | 14.4 |
|                                  |          |         | Cs: Pb: Br: Cl: Mn = 1: 0.99: 1.65: 3.8: 1.3 |      |      |      |      |
|                                  | XPS      | 76.38   | 1.17                                         | 2.87 | 9.61 | 8.35 | 1.62 |
|                                  |          |         | Cs: Pb: Br: Cl: Mn = 1: 2.5: 8.2: 7.1: 1.4   |      |      |      |      |

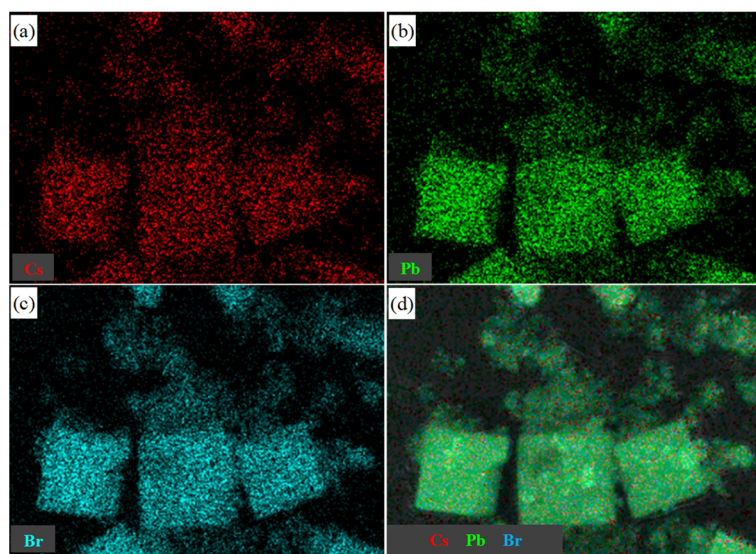

**Figure S11.** The elemental maps of the pristine CsPbBr<sub>3</sub>: (a) Cs, (b) Pb, (c) Br, and (d) their overlay.

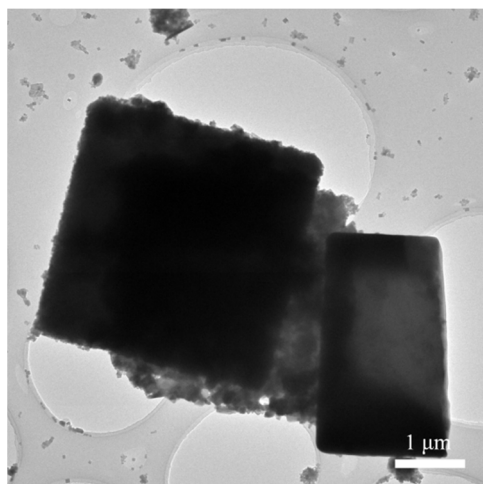

**Figure S12.** TEM image of the optimum CsPb(Cl/Br)<sub>3</sub>:Mn product.

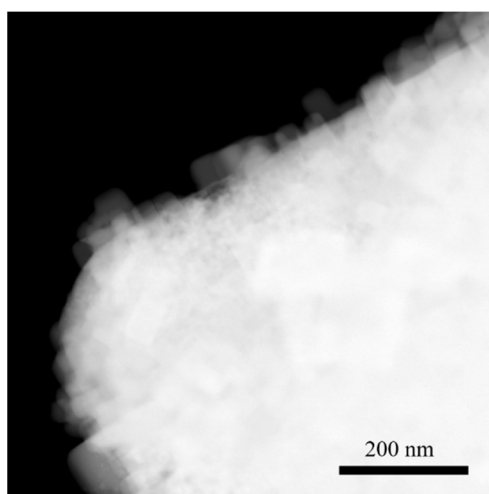

**Figure S13.** HAADF-STEM image of the optimum CsPb(Cl/Br)<sub>3</sub>:Mn product.

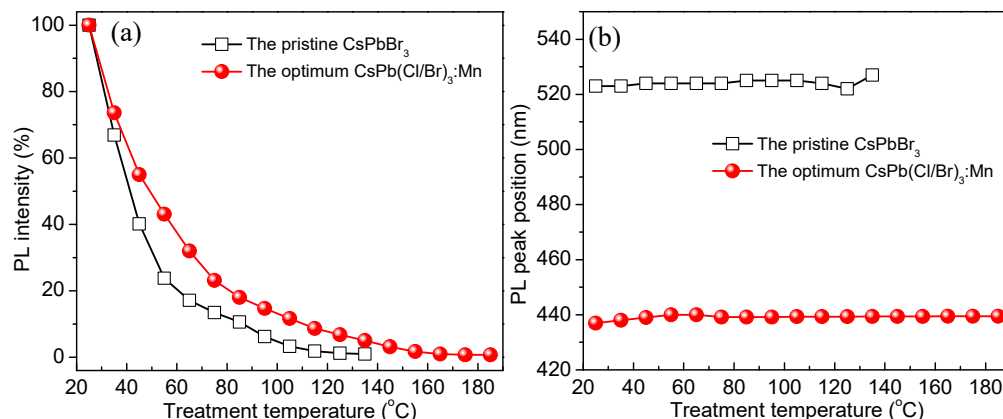

**Figure S14.** The changes of PL peak (a) intensities and (b) positions of the pristine CsPbBr<sub>3</sub> and the optimum CsPb(Cl/Br)<sub>3</sub>:Mn product as the increase of the treatment temperature.

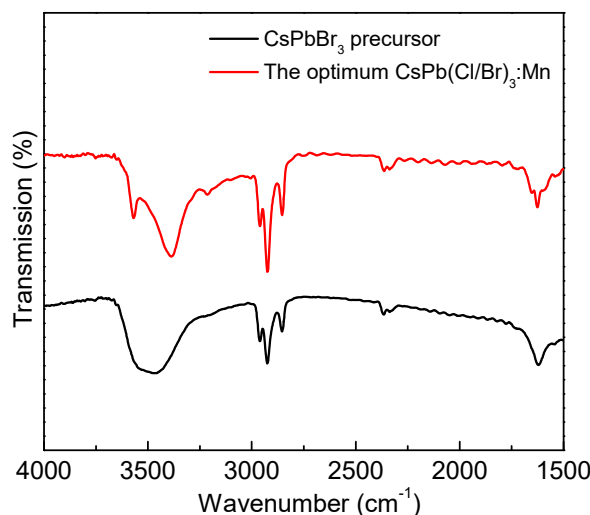

**Figure S15.** FTIR spectra of the CsPbBr<sub>3</sub> precursor and the optimum CsPb(Cl/Br)<sub>3</sub>:Mn product. The main vibration bands at 3475 and 1625 cm<sup>-1</sup> are attributed to the symmetric stretching of N-H and asymmetric NH<sub>3</sub><sup>+</sup> deformation [1], respectively. The vibration bands in the range of 2926 and 2856 cm<sup>-1</sup> are ascribed to the hydrocarbon groups [2].

## References

1. Li, X.; Cai, W.; Guan, H.; Zhao, S.; Cao, S.; Chen, C.; Liu, M.; Zang, Z. Highly stable CsPbBr<sub>3</sub> quantum dots by silica-coating and ligand modification for white light-emitting diodes and visible light communication. *Chemical Engineering Journal* **2021**, *419*, 129551, doi:10.1016/j.cej.2021.129551.
2. Chen, W.; Shi, T.; Du, J.; Zang, Z.; Yao, Z.; Li, M.; Sun, K.; Hu, W.; Leng, Y.; Tang, X. Highly Stable Silica-Wrapped Mn-Doped CsPbCl<sub>3</sub> Quantum Dots for Bright White Light-Emitting Devices. *ACS Appl. Mater. Interfaces* **2018**, *10*, 43978-43986, doi:10.1021/acsami.8b14046.
